# Supplementary material for: Molecular-level carbon traits of fine roots: unveiling adaptation and decomposition under flooded condition
Source: Copernicus journal article supplement (doi:10.5194/bg-2023-135), 2023-10-09
Supplement: Supplementary file 1 [file bg-2023-135-supplement.pdf]

1 *Supplement of*

2 **Molecular-level carbon traits of fine roots: unveiling adaptation and decomposition under**  
3 **flooded condition**

4

5 Mengke Wang et al.

6

7 *Correspondence to:* Sifang Kong (mengsksf@163.com) and Junjian Wang (wangjj@sustech.edu.cn)

8 **Text S1 Root sample collection**

9 For soil-grown fine roots (SGR), surface soil (approximately 0–20 cm) at the tree base was carefully excavated to  
10 expose the primary lateral roots following the procedure described by Guo et al. (2008). For and water-grown fine  
11 roots (WGR), whole root systems growing in water were collected. Root branches with intact terminal branch orders  
12 were cut, and over 50 g of total fresh biomass of the first three-order roots was obtained from each tree. The function  
13 of the first three-order roots is mainly resource absorption (McCormack et al., 2015), and the “fine roots” in this  
14 study refer to these absorptive fine roots of the first three orders. Subsamples of the fine roots separated from the  
15 root systems were gently washed in low-temperature deionized water to remove soil adhering to the roots.

16

17 **REFERENCES**

18 Guo, D., Xia, M., Wei, X., Chang, W., Liu, Y., and Wang, Z.: Anatomical traits associated with absorption and  
19 mycorrhizal colonization are linked to root branch order in twenty-three Chinese temperate tree species, *New*  
20 *Phytol.*, 180, 673-683, <https://doi.org/10.1111/j.1469-8137.2008.02573.x>, 2008.

21 McCormack, M. L., Dickie, I. A., Eissenstat, D. M., Fahey, T. J., Fernandez, C. W., Guo, D., Helmisaari, H. S.,  
22 Hobbie, E. A., Iversen, C. M., Jackson, R. B., Leppalammi-Kujansuu, J., Norby, R. J., Phillips, R. P., Pregitzer,  
23 K. S., Pritchard, S. G., Rewald, B., and Zadworny, M.: Redefining fine roots improves understanding of below-  
24 ground contributions to terrestrial biosphere processes, *New Phytol.*, 207, 505-518,  
25 <https://doi.org/10.1111/nph.13363>, 2015.

## 26 **Text S2 Sequential extraction procedure and GC-MS quantification**

27 Solvent extraction for the dichloromethane and methanol extractable fraction ( $F_{\text{DCMe}}$ ) was performed with 100.0 mg  
28 of homogenized root samples (R1), which was extracted with 15 mL dichloromethane (DCM), methanol (MeOH):  
29 DCM (1:1, v/v), and MeOH consecutively in 50 mL fluorinated ethylene propylene (FEP) tubes via ultrasonication  
30 for 15 min on an ultrasonic instrument (ANPEL 2400TH; frequency of 40 kHz) at 20°C. After centrifugation (3000  
31 g for 5 min), the combined solvent extracts were concentrated via rotary evaporation and filtered through a 0.45  $\mu\text{m}$   
32 polyether sulfone filter. The filtrates were dried under  $\text{N}_2$  gas in 2 mL glass vials. The remaining samples (non-  
33 extractable residues, R2) were air-dried, weighed, and stored at  $-20^\circ\text{C}$ .

34 For the base-hydrolyzable fraction ( $F_{\text{KOHhy}}$ ), subsamples of the solvent-extracted residues (R2) were hydrolyzed with  
35 15 mL of freshly prepared 1  $\text{mol}\cdot\text{L}^{-1}$  methanolic KOH in hydrothermal reactors with 20 mL polytetrafluoroethylene  
36 (PTFE) cups at 100°C for 3 h. After cooling to 20°C, the contents were centrifuged, and the supernatants were  
37 allowed to evaporate, then they were acidified to  $\text{pH} < 1$ . The hydrolyzable products were liquid–liquid extracted  
38 with 30 mL ethyl acetate three times. The extracts were then concentrated via rotary evaporation and dried under  $\text{N}_2$   
39 gas in 2 mL glass vials. The remaining samples (R3) were air-dried, weighed, and stored at  $-20^\circ\text{C}$ .

40 For the CuO-oxidizable fraction ( $F_{\text{CuOox}}$ ), subsamples after the base hydrolysis (R3) were oxidized with 1 g CuO,  
41 100 mg  $\text{Fe}(\text{NH}_4)_2(\text{SO}_4)_2\cdot 6\text{H}_2\text{O}$ , and 15 mL of 1  $\text{mol}\cdot\text{L}^{-1}$  NaOH (pre-sparged with  $\text{N}_2$  for 5 min) in PTFE-lined  
42 reactors at 170°C for 2.5 h. After cooling to room temperature (20°C), the reaction products were centrifuged; the  
43 supernatants were then allowed to evaporate, acidified to  $\text{pH} < 1$ , and kept in the dark for at least 1 h. The lignin  
44 phenols were liquid–liquid extracted with 30 mL ethyl acetate three times. The extracts were then concentrated and  
45 dried under  $\text{N}_2$  gas in 2 mL glass vials. The remaining samples (R4) were washed with 0.01  $\text{mol}\cdot\text{L}^{-1}$  HCl to remove  
46 any excess CuO and then rinsed with deionized water to remove excess HCl, followed by freeze-drying, weighing,  
47 and storing at  $-20^\circ\text{C}$ .

48 Aliquots of  $F_{\text{DCMe}}$  and  $F_{\text{CuOox}}$  were trimethylsilyl derivatized with *N,O*-bis(trimethylsilyl)trifluoroacetamide (BSTFA)  
49 at 70°C for 1 h. An aliquot of  $F_{\text{KOHhy}}$  was first methylated with *N,N*-dimethylformamide dimethyl acetal (DMF-  
50 DMA) at 60°C for 0.5 h and then trimethylsilyl derivatized. After derivatization, all compounds were analyzed using  
51 an Agilent 7890B gas chromatograph equipped with a 5977B mass spectrometer using an HP-5MS column (30 m  $\times$   
52 0.25 mm i.d., film thickness, 0.25  $\mu\text{m}$ ). The injection volume was 1  $\mu\text{L}$ , and the injection temperature was 300°C.  
53 The oven temperature was programmed from 60 to 300°C at a rate of 6°C $\cdot\text{min}^{-1}$  and held at 300°C for 20 min. The  
54 compounds of  $F_{\text{DCMe}}$  and  $F_{\text{KOHhy}}$  were detected in scan mode, with the mass scan range from 50 to 550 Da.  $F_{\text{CuOox}}$   
55 compounds were detected in selected ion mode based on the method of Kaiser and Benner (2012). For  $F_{\text{DCMe}}$ , a  
56 mixed standard of tetracosane, 1-docosanol, methyl tricosanoate, and ergosterol was used. For aliphatics in  $F_{\text{KOHhy}}$ , a  
57 mixed standard of methyl tricosanoate and methyl oleate was used. For phenolics in  $F_{\text{KOHhy}}$  and  $F_{\text{CuOox}}$ , a mixed  
58 standard containing a total of 11 lignin phenols (including *p*-hydroxybenzoic acid (PAD), *p*-hydroxyacetophenone  
59 (PON), *p*-hydroxybenzaldehyde (PAL), vanillic acid (VAD), acetovanillone (VON), vanillin (VAL), syringic acid  
60 (SAD), acetosyringone (SON), syringaldehyde (SAL), *p*-coumaric acid (CAD), and ferulic acid (FAD)) was used.

61 Also, the total carbon content of root samples (R1) and residues after dichloromethane and methanol extraction (R2),  
62 base hydrolysis (R3), and CuO oxidation (R4; Figure 1) were determined using a Vario MACRO cube elemental

63 analyzer (Elementar, Hanau, Germany). Root ash content was determined as the remaining proportion of root mass  
64 after burning at 550°C in a muffle furnace for 4 h.

65

## 66 **REFERENCES**

67 Kaiser, K. and Benner, R.: Characterization of lignin by gas chromatography and mass spectrometry using a  
68 simplified CuO oxidation method, *Anal. Chem.*, 84, 459-464, <https://doi.org/10.1021/ac202004r>, 2012.

69 **Table S1** Molecular-level compositions of dichloromethane and methanol extractable fractions ( $F_{DcMe}$ ) and base-  
70 hydrolyzable fractions ( $F_{KOHhy}$ ) of soil-grown (SGR) and water-grown fine roots (WGR). x-/ω-OH acids: x- or ω-  
71 hydroxyalkanoic acids; FAs: saturated normal fatty acids; DAs: saturated normal fatty diacids; UAs: unsaturated  
72 normal fatty acid.

|       |                       | SGR          | WGR          |
|-------|-----------------------|--------------|--------------|
| FDcMe | phenolics             | 1.46 ± 0.04  | 2.25 ± 0.27  |
|       | Vanillin              | 0.15 ± 0     | 0.33 ± 0.03  |
|       | 3-Hydroxybenzoic acid | 0.24 ± 0.01  | 0.19 ± 0.04  |
|       | 4-Hydroxybenzoic acid | 0.23 ± 0.03  | 0.26 ± 0.03  |
|       | Protocatechoic acid   | 0.84 ± 0.06  | 1.02 ± 0.14  |
|       | Ferulic acid          | 0            | 0.46 ± 0.06  |
|       | glycerolics           | 3.7 ± 0.17   | 2.41 ± 0.21  |
|       | Glycerol              | 3.31 ± 0.05  | 1.75 ± 0.11  |
|       | 1-Monopalmitin        | 0.39 ± 0.13  | 0.66 ± 0.10  |
|       | prenolics             | 5.84 ± 0.63  | 14.3 ± 1.07  |
|       | Dihydroabietic acid   | 0.13 ± 0.03  | 0.15 ± 0.03  |
|       | β-Guaiene-like        | 0            | 0.22 ± 0.04  |
|       | β-Guaiene             | 0.13 ± 0     | 0.23 ± 0.02  |
|       | α-Panasinsen          | 0.15 ± 0.03  | 0.31 ± 0.03  |
|       | Globulol-like         | 0.20 ± 0.04  | 0.29 ± 0.06  |
|       | Globulol              | 1.72 ± 0.22  | 5.42 ± 0.33  |
|       | Terpene-like 1        | 0.23 ± 0.02  | 0.27 ± 0.01  |
|       | Terpene-like 2        | 0.21 ± 0.03  | 0.86 ± 0.07  |
|       | Terpene-like 3        | 0.39 ± 0.07  | 0            |
|       | Terpene-like 4        | 0.38 ± 0.05  | 0.47 ± 0.04  |
|       | Terpene-like 5        | 0.59 ± 0.05  | 1.77 ± 0.17  |
|       | Terpene-like 6        | 0.28 ± 0.04  | 0.49 ± 0.03  |
|       | Andrographolide       | 0.20 ± 0.02  | 0.62 ± 0.06  |
|       | Terpene-like 7        | 0.44 ± 0.07  | 1.17 ± 0.12  |
|       | Terpene-like 8        | 0.45 ± 0.05  | 1.38 ± 0.11  |
|       | Terpene-like 9        | 0.35 ± 0.09  | 0.63 ± 0.08  |
|       | carbohydrates         | 9.13 ± 1.09  | 7.06 ± 0.78  |
|       | meso-Erythritol       | 0.57 ± 0.32  | 0.50 ± 0.04  |
|       | Ribofuranose          | 0.15 ± 0.01  | 0.31 ± 0.04  |
|       | α-Arabinopyranose     | 0.13 ± 0     | 0.17 ± 0.03  |
|       | Arabinopyranose       | 0.15 ± 0.02  | 0.18 ± 0.03  |
|       | Fucopyranose          | 0.39 ± 0.05  | 0.29 ± 0.04  |
|       | Xylitol               | 1.36 ± 0.52  | 1.52 ± 0.13  |
|       | Fructofuranose        | 0.97 ± 0.27  | 0.33 ± 0.08  |
|       | Sorbitol              | 1.64 ± 0.35  | 2.00 ± 0.16  |
|       | Glucose               | 1.20 ± 0.09  | 0.93 ± 0.04  |
|       | Myo-Inositol          | 1.45 ± 0.04  | 0.37 ± 0.10  |
|       | Sucrose               | 0.51 ± 0.45  | 0.05 ± 0.08  |
|       | Lactose               | 0.60 ± 0.13  | 0.41 ± 0.10  |
|       | fatty acyls           | 17.03 ± 1.96 | 11.82 ± 1.80 |

|                                      |                     |                    |
|--------------------------------------|---------------------|--------------------|
| Hexanoic acid                        | 0.92 ± 0.34         | 0.78 ± 0.09        |
| Glycolic acid                        | 0.99 ± 0.02         | 0.57 ± 0.16        |
| Levulinic acid                       | 0.62 ± 0.07         | 0.70 ± 0.13        |
| Hydracrylic acid                     | 0.21 ± 0.19         | 0.22 ± 0.04        |
| 3-Hydroxybutyric acid                | 0.61 ± 0.13         | 0.50 ± 0.05        |
| Butanedioic acid                     | 0.79 ± 0.13         | 0.67 ± 0.09        |
| 2,3-Dihydroxy-2-methylpropanoic acid | 0.31 ± 0.04         | 0.43 ± 0.08        |
| Glyceric acid                        | 0.22 ± 0.08         | 0.11 ± 0.10        |
| 2-Butenedioic acid                   | 0.28 ± 0.19         | 0                  |
| Nonanoic acid                        | 0.07 ± 0.12         | 0.26 ± 0.06        |
| 6-Hydroxyhexanoic acid               | 0.03 ± 0.05         | 0                  |
| Doconexent                           | 0.09 ± 0.10         | 0.22 ± 0.07        |
| Malic acid                           | 2.25 ± 0.52         | 0.36 ± 0.20        |
| Azelaic acid                         | 0.43 ± 0.16         | 0.54 ± 0.11        |
| Citric acid                          | 1.20 ± 0.14         | 0.60 ± 0.16        |
| Myristic acid                        | 0.33 ± 0.14         | 0                  |
| Palmitelaidic acid                   | 1.97 ± 0.42         | 1.21 ± 0.10        |
| Palmitic Acid                        | 3.37 ± 0.54         | 2.97 ± 0.24        |
| Hexadecane-1,2-diol                  | 0.59 ± 0.19         | 0.46 ± 0.05        |
| 11-Octadecenoic acid                 | 0.74 ± 0.18         | 0.47 ± 0.07        |
| Stearic acid                         | 1.02 ± 0.04         | 0.75 ± 0.20        |
| steroids                             | 53.83 ± 4.41        | 125.68 ± 8.80      |
| 11-Ketoetiocholanolone               | 1.23 ± 0.14         | 1.13 ± 0.08        |
| Steroid-like 1                       | 0                   | 1.08 ± 0.06        |
| Androst-5-ene                        | 0                   | 1.61 ± 0.13        |
| Steroid-like 2                       | 1.16 ± 0.09         | 2.55 ± 0.2         |
| Glycocholate-like 1                  | 1.23 ± 0.09         | 1.61 ± 0.1         |
| Acetic acid                          | 1.54 ± 0.15         | 2.06 ± 0.21        |
| Steroid-like 3                       | 1.10 ± 0.06         | 1.80 ± 0.11        |
| Steroid-like 4                       | 1.32 ± 0.08         | 2.24 ± 0.21        |
| Glycocholate-like 2                  | 1.07 ± 0.05         | 1.72 ± 0.16        |
| Glycocholate-like 3                  | 2.42 ± 0.43         | 1.87 ± 0.20        |
| Steroid-like 5                       | 1.26 ± 0.09         | 2.85 ± 0.23        |
| Steroid-like 6                       | 1.10 ± 0.09         | 2.51 ± 0.17        |
| Glycocholate-like 4                  | 0                   | 1.21 ± 0.15        |
| Glycocholate-like 5                  | 1.10 ± 0.10         | 1.50 ± 0.09        |
| Campesterol                          | 3.87 ± 0.26         | 2.56 ± 0.12        |
| Stigmasterol                         | 3.01 ± 0.11         | 2.94 ± 0.24        |
| β-Sitosterol                         | 6.03 ± 0.10         | 5.06 ± 0.30        |
| Cholestane-like 1                    | 2.09 ± 0.29         | 5.79 ± 0.82        |
| Cholestane-like 2                    | 3.63 ± 1.21         | 16.35 ± 1.63       |
| Androstadien-like                    | 17.41 ± 2.28        | 45.08 ± 2.66       |
| β-Eudesmol                           | 1.52 ± 0.06         | 7.91 ± 0.84        |
| 25-Hydroxycholesterol                | 1.77 ± 0.08         | 14.25 ± 2.31       |
| <b>FKOHhy Aliphatics</b>             | <b>11.88 ± 1.01</b> | <b>9.67 ± 0.27</b> |

|                       |                     |                     |
|-----------------------|---------------------|---------------------|
| <b>x-OH acids</b>     | <b>0.36 ± 0.04</b>  | <b>0.28 ± 0.01</b>  |
| 9, 10-OH 18 FA        | 0.17 ± 0.03         | 0.13 ± 0            |
| 2-OH C10 DA           | 0.18 ± 0            | 0.15 ± 0            |
| ω-OH acids            | 0.64 ± 0.03         | 0.58 ± 0.01         |
| ω-OH C16 FA           | 0.41 ± 0.03         | 0.38 ± 0.01         |
| ω-OH C22 FA           | 0.23 ± 0.01         | 0.21 ± 0.02         |
| n-alkanols            | 1.3 ± 0.18          | 1.04 ± 0.03         |
| C22 alkanol           | 0.62 ± 0.07         | 0.50 ± 0.01         |
| C24 alkanol           | 0.49 ± 0.09         | 0.38 ± 0.01         |
| C26 alkanol           | 0.19 ± 0.02         | 0.16 ± 0.01         |
| <b>FAs</b>            | <b>2.02 ± 0.03</b>  | <b>1.56 ± 0.01</b>  |
| C16 FA                | 1.07 ± 0.07         | 0.77 ± 0.02         |
| C18 FA                | 0.39 ± 0.01         | 0.32 ± 0.01         |
| C24 FA                | 0.18 ± 0.01         | 0.14 ± 0.01         |
| C26 FA                | 0.38 ± 0.02         | 0.32 ± 0.01         |
| <b>DAs</b>            | <b>2.01 ± 0.06</b>  | <b>1.83 ± 0.08</b>  |
| C10 DA                | 0.21 ± 0.01         | 0.15 ± 0.01         |
| C11 DA                | 0.21 ± 0.01         | 0.15 ± 0.01         |
| C16 DA                | 1.18 ± 0.03         | 1.08 ± 0.08         |
| C18 DA                | 0.42 ± 0.03         | 0.46 ± 0.01         |
| <b>UAs</b>            | <b>5.56 ± 0.74</b>  | <b>4.36 ± 0.15</b>  |
| 9-C16:1 FA            | 1.47 ± 0.10         | 1.22 ± 0.07         |
| 9-C18:1 FA            | 0.45 ± 0.01         | 0.31 ± 0.01         |
| 11-C18:1 FA           | 0.49 ± 0.02         | 0.30 ± 0.01         |
| 9, 12-C18:2 FA        | 1.47 ± 0.37         | 1.00 ± 0.05         |
| 9-C20:1 FA            | 0.45 ± 0.07         | 0.35 ± 0.01         |
| 10,13-C20:2 FA        | 0.45 ± 0.13         | 0.34 ± 0.02         |
| 13-C22:1 FA           | 0.44 ± 0.06         | 0.48 ± 0.03         |
| 15-C24:1 FA           | 0.35 ± 0.02         | 0.35 ± 0.02         |
| <b>Phenolics</b>      | <b>13.08 ± 0.28</b> | <b>25.27 ± 1.84</b> |
| Benzoic acid          | 0.49 ± 0            | 0.34 ± 0.01         |
| p-Hydroxybenzaldehyde | 0.54 ± 0.03         | 0.44 ± 0.01         |
| p-Hydroxybenzoic acid | 0.59 ± 0            | 0.55 ± 0.03         |
| Acetovanillone        | 0.45 ± 0.02         | 0.55 ± 0.04         |
| Vanillic acid         | 2.65 ± 0.18         | 4.98 ± 0.40         |
| Vanillin              | 1.02 ± 0.09         | 2.73 ± 0.18         |
| iso-Vanillin          | 0.49 ± 0.02         | 1.17 ± 0.09         |
| Syringic acid         | 1.05 ± 0.05         | 0.63 ± 0.04         |
| Syringaldehyde        | 0.38 ± 0.02         | 0.37 ± 0.01         |
| p-Coumaric acid       | 0.53 ± 0.24         | 0.41 ± 0.02         |
| Ferulic acid          | 3.31 ± 0.18         | 11.13 ± 0.91        |
| iso-Ferulic acid      | 0.55 ± 0.02         | 0.95 ± 0.15         |
| Bisphenol1            | 0.37 ± 0.04         | 0.43 ± 0.06         |
| Bisphenol2            | 0.32 ± 0.01         | 0.33 ± 0.01         |
| Bisphenol3            | 0.37 ± 0.02         | 0.25 ± 0            |

74 **Table S2** Chemical properties (means  $\pm$  standard errors) of CuO-oxidizable fractions ( $F_{CuOox}$ ) of different fine-root samples. The *P*-value indicates the  
 75 significance level of a two-tailed *t*-test between soil-grown roots (SGR) and water-grown roots (WGR).

|                                      | Abbreviations               | Units                | SGR              | WGR              | <i>P</i> -values |
|--------------------------------------|-----------------------------|----------------------|------------------|------------------|------------------|
| Total 11 phenol yield                | $\Lambda 11$                | mg g C <sup>-1</sup> | 24.21 $\pm$ 5.25 | 30.93 $\pm$ 2.95 | 0.125            |
| Total lignin phenol yield            | $\Lambda 8$                 | mg g C <sup>-1</sup> | 23.32 $\pm$ 4.86 | 29.07 $\pm$ 2.56 | 0.144            |
| <i>p</i> -hydroxy phenol yield       | <i>P</i>                    | mg g C <sup>-1</sup> | 0.89 $\pm$ 0.38  | 1.86 $\pm$ 0.45  | 0.047            |
| Vanillyl phenol yield                | <i>V</i>                    | mg g C <sup>-1</sup> | 15.63 $\pm$ 3.23 | 21.23 $\pm$ 2.33 | 0.072            |
| Syringyl phenol yield                | <i>S</i>                    | mg g C <sup>-1</sup> | 6.81 $\pm$ 1.61  | 6.97 $\pm$ 0.87  | 0.890            |
| Cinnamyl phenol yield                | <i>C</i>                    | mg g C <sup>-1</sup> | 0.87 $\pm$ 0.54  | 0.87 $\pm$ 0.58  | 0.999            |
| Vanillyl : lignin phenol ratio       | <i>V</i> : $\Lambda 8$      | -                    | 0.67 $\pm$ 0.01  | 0.73 $\pm$ 0.02  | 0.009            |
| Syringyl: lignin phenol ratio        | <i>S</i> : $\Lambda 8$      | -                    | 0.29 $\pm$ 0.01  | 0.24 $\pm$ 0.01  | 0.009            |
| Cinnamyl: lignin phenol ratio        | <i>C</i> : $\Lambda 8$      | -                    | 0.04 $\pm$ 0.02  | 0.03 $\pm$ 0.02  | 0.729            |
| Syringyl : vanillyl phenol ratio     | <i>S</i> : <i>V</i>         | -                    | 0.43 $\pm$ 0.02  | 0.33 $\pm$ 0.02  | 0.002            |
| Cinnamyl : vanillyl phenol ratio     | <i>C</i> : <i>V</i>         | -                    | 0.06 $\pm$ 0.04  | 0.04 $\pm$ 0.03  | 0.641            |
| Acid : aldehyde for vanillyl phenols | (Ad:Al) <sub><i>V</i></sub> | -                    | 0.38 $\pm$ 0.05  | 0.46 $\pm$ 0.02  | 0.056            |
| Acid : aldehyde for syringyl phenols | (Ad:Al) <sub><i>S</i></sub> | -                    | 0.40 $\pm$ 0.03  | 0.53 $\pm$ 0.05  | 0.020            |

76



77 **Table S3** The number of assigned formulae and the sum of assigned signal of three replicates, and the number of formulae and percentage of signal of their  
 78 common formulae. F<sub>DcMe</sub>: dichloromethane and methanol extractable fractions; F<sub>KOHhy</sub>: base-hydrolyzable fractions; F<sub>CuOox</sub>: CuO-oxidizable fractions.

|                        |                             | SGR               |                    |                    | WGR               |                    |                    |     |
|------------------------|-----------------------------|-------------------|--------------------|--------------------|-------------------|--------------------|--------------------|-----|
|                        |                             | F <sub>DcMe</sub> | F <sub>KOHhy</sub> | F <sub>CuOox</sub> | F <sub>DcMe</sub> | F <sub>KOHhy</sub> | F <sub>CuOox</sub> |     |
| <b>Replicate-1</b>     | Number of assigned formulae | 3913              | 2674               | 4285               | 3078              | 2383               | 2347               |     |
|                        | Sum of assigned signal      | 1.72E+11          | 1.42E+11           | 1.76E+11           | 1.10E+11          | 6.28E+10           | 5.24E+10           |     |
| <b>Replicate-2</b>     | Number of assigned formulae | 3445              | 3029               | 4546               | 3381              | 3021               | 2254               |     |
|                        | Sum of assigned signal      | 1.90E+11          | 1.60E+11           | 1.72E+11           | 1.10E+11          | 8.37E+10           | 5.71E+10           |     |
| <b>Replicate-3</b>     | Number of assigned formulae | 3252              | 2608               | 4214               | 3457              | 2662               | 2201               |     |
|                        | Sum of assigned signal      | 1.37E+11          | 1.53E+11           | 1.48E+11           | 1.31E+11          | 7.48E+10           | 5.04E+10           |     |
| <b>Common formulae</b> | Number of formulae          | 2500              | 2070               | 3380               | 2594              | 1962               | 1746               |     |
|                        | Percentage of signal        | replicate-1       | 78%                | 92%                | 87%               | 90%                | 95%                | 93% |
|                        |                             | replicate-2       | 88%                | 74%                | 94%               | 91%                | 90%                | 94% |
|                        |                             | replicate-3       | 93%                | 86%                | 94%               | 86%                | 93%                | 94% |

79 **Table S4** Molecular characterization of sequentially extractable fractions in soil-grown roots (SGR) and water-grown roots (WGR), as determined using Fourier  
80 transform ion cyclotron resonance mass spectrometry (FT-ICR MS). “wa” indicates intensity weighted average value. Different letters indicate the statistically  
81 significant differences ( $P < 0.05$ ) among the three fractions. Asterisks indicate the statistically significant differences ( $P < 0.05$ ) of a certain fraction between  
82 SGR and WGR. F<sub>DcMe</sub>: dichloromethane and methanol extractable fractions; F<sub>KOHhy</sub>: base-hydrolyzable fractions; F<sub>CuOox</sub>: CuO-oxidizable fractions. CHO:  
83 formulae containing only carbon, hydrogen, and oxygen; CHON: formulae containing only carbon, hydrogen, oxygen, and nitrogen; CHOS: formulae containing  
84 only carbon, hydrogen, oxygen, and sulfur; CHONS: formulae containing only carbon, hydrogen, oxygen, nitrogen, and sulfur.

|                             | SGR               |     |                    |     |                    |     | WGR               |     |                    |     |                    |     |
|-----------------------------|-------------------|-----|--------------------|-----|--------------------|-----|-------------------|-----|--------------------|-----|--------------------|-----|
|                             | F <sub>DcMe</sub> |     | F <sub>KOHhy</sub> |     | F <sub>CuOox</sub> |     | F <sub>DcMe</sub> |     | F <sub>KOHhy</sub> |     | F <sub>CuOox</sub> |     |
| Number of assigned formulae | 3537 ± 340        | b   | 2770 ± 226         | c   | 4348 ± 175         | a * | 3305 ± 201        | a   | 2689 ± 320         | b   | 2267 ± 74          | b   |
| $m/z_{wa}$                  | 359 ± 10          | a   | 359 ± 13           | a   | 366 ± 1            | a   | 362 ± 2           | a   | 365 ± 4            | a   | 367 ± 1            | a   |
| H/C <sub>wa</sub>           | 1.68 ± 0.00       | a * | 1.59 ± 0.02        | b * | 1.56 ± 0.02        | c * | 1.38 ± 0.02       | a   | 0.93 ± 0.01        | b   | 0.87 ± 0.00        | c   |
| O/C <sub>wa</sub>           | 0.33 ± 0.01       | a   | 0.34 ± 0.01        | a   | 0.35 ± 0.01        | a   | 0.38 ± 0.01       | c * | 0.52 ± 0.01        | b * | 0.54 ± 0.01        | a * |
| DBE <sub>wa</sub>           | 4.07 ± 0.11       | c   | 4.79 ± 0.08        | b   | 5.14 ± 0.20        | a   | 6.61 ± 0.24       | c * | 10.34 ± 0.07       | b * | 10.81 ± 0.09       | a * |
| AI <sub>mod wa</sub>        | 0.09 ± 0.00       | c   | 0.12 ± 0.01        | b   | 0.14 ± 0.01        | a   | 0.23 ± 0.01       | c * | 0.46 ± 0.00        | b * | 0.49 ± 0.00        | a * |
| NOSC <sub>wa</sub>          | -0.98 ± 0.03      | c   | -0.89 ± 0.04       | b   | -0.8 ± 0.04        | a   | -0.58 ± 0.04      | c * | 0.12 ± 0.01        | b * | 0.23 ± 0.03        | a * |
| Number of CHO (%)           | 54 ± 2            | b   | 58 ± 1             | a   | 50 ± 0             | c   | 58 ± 2            | b   | 64 ± 5             | a   | 68 ± 1             | a * |
| Abundance of CHO (%)        | 84 ± 0            | a   | 87 ± 2             | a   | 86 ± 1             | a   | 91 ± 0            | a * | 89 ± 2             | a   | 90 ± 0             | a * |
| Number of CHON (%)          | 34 ± 1            | b   | 36 ± 1             | b   | 44 ± 1             | a * | 40 ± 1            | a * | 34 ± 5             | ab  | 30 ± 1             | b   |
| Abundance of CHON (%)       | 8 ± 1             | b   | 12 ± 3             | a   | 12 ± 1             | a * | 9 ± 0             | a   | 11 ± 2             | a   | 9 ± 0              | a   |
| Number of CHOS (%)          | 12 ± 1            | a * | 6 ± 1              | b * | 6 ± 1              | b * | 3 ± 0             | a   | 1 ± 0              | b   | 2 ± 1              | ab  |
| Abundance of CHOS (%)       | 6 ± 1             | a * | 2 ± 0              | b * | 2 ± 0              | b * | <1                | a   | <1                 | a   | <1                 | a   |
| Number of CHONS (%)         | 1 ± 0             | a * | <1                 | b   | <1                 | b   | <1                | a   | <1                 | a   | <1                 | a   |
| Abundance of CHONS (%)      | 1 ± 0             | a * | <1                 | b   | <1                 | b   | <1                | a   | <1                 | a   | <1                 | a   |

85

86 **Table S5** Two-way ANOVA for the effects of redox condition, root class and their interaction on root carbon  
87 remaining during root decomposition.

|                             | Carbon remaining |          |
|-----------------------------|------------------|----------|
|                             | <i>F</i>         | <i>P</i> |
| Redox condition             | 241.05           | < 0.001  |
| Root type                   | 162.94           | < 0.001  |
| Redox condition × Root type | 0.14             | 0.714    |

88

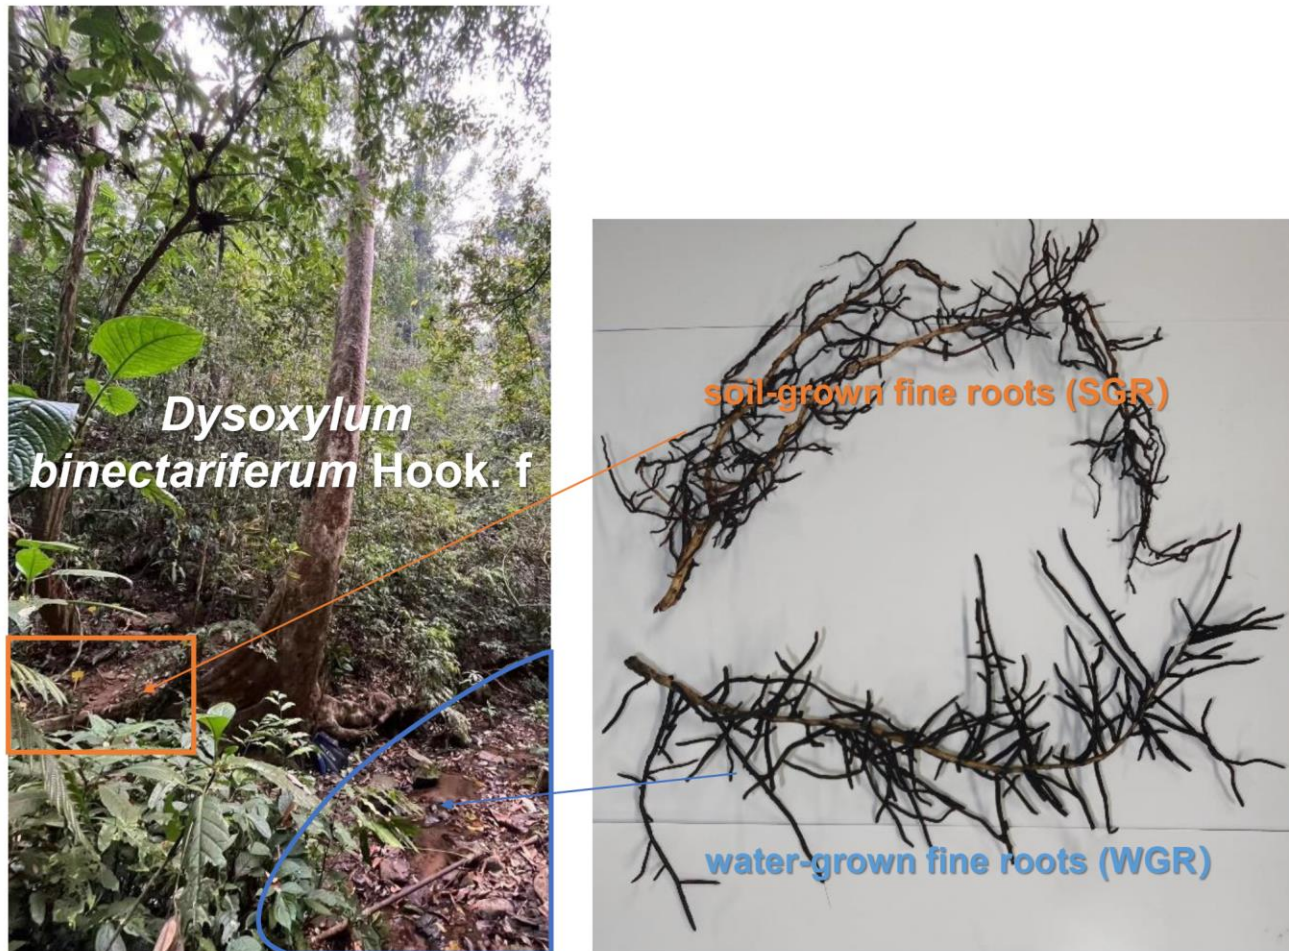

89

90 **Figure S1** One of the mature trees of *Dysoxylum binectariferum* Hook. f growing by a slow flowing stream and its soil-grown (SGR) and water-grown fine roots  
91 (WGR). WGR had observably different morphology, such as larger diameter and less branches. These photographic materials were taken by Mengke Wang.

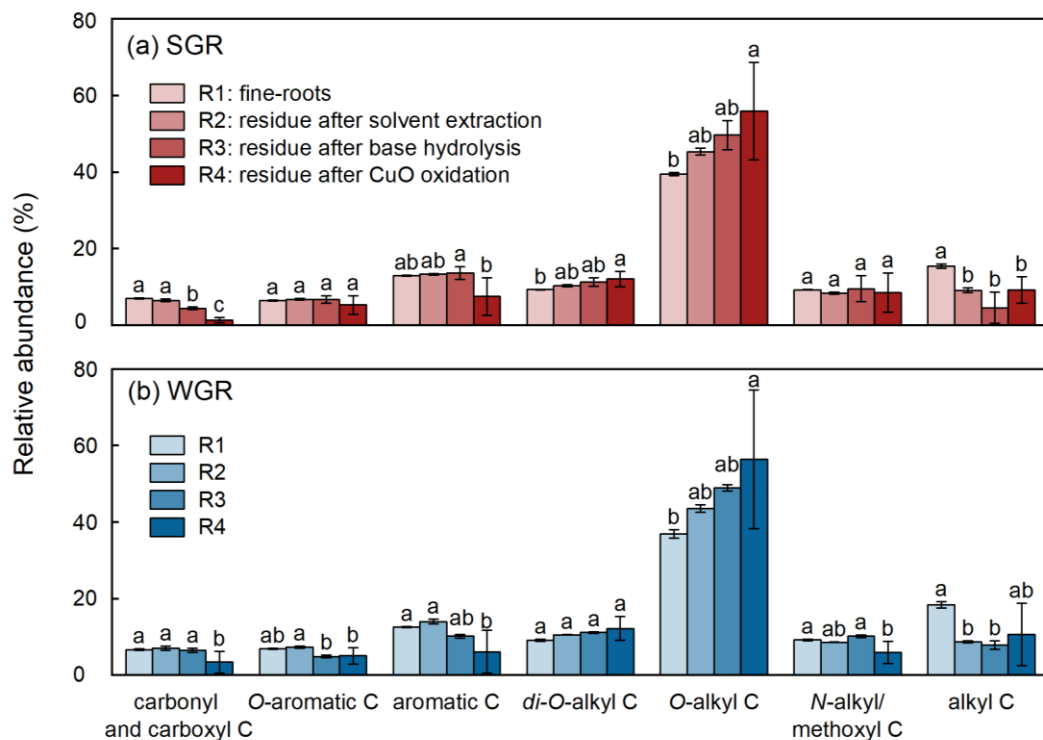

92  
 93 **Figure S2** Solid-state  $^{13}\text{C}$  cross-polarization magic angle spinning nuclear magnetic resonance integration results for  
 94 SGR (a) and WGR (b) samples before and during sequential extraction with a variety of extraction procedures. Bars  
 95 represent mean  $\pm$  standard error ( $n = 3$ ). Different letters at the top of each bar indicate significant differences ( $P <$   
 96  $0.05$ ) in percentages of carbon regions among different solid phases after sequential extraction. Four colors from  
 97 light to dark indicate original fine-root samples (R1) and residues after solvent extraction (R2), base hydrolysis (R3),  
 98 and CuO oxidation (R4). The carbonyl and carboxyl C, *O*-aromatic C, aromatic C, *di-O*-alkyl C, *O*-alkyl C, *N*-  
 99 alkyl/methoxy C, and alkyl C are restricted within chemical shifts (ppm) of 165–210, 145–165, 110–145, 95–110,  
 100 60–95, 45–60, and 0–45, respectively.

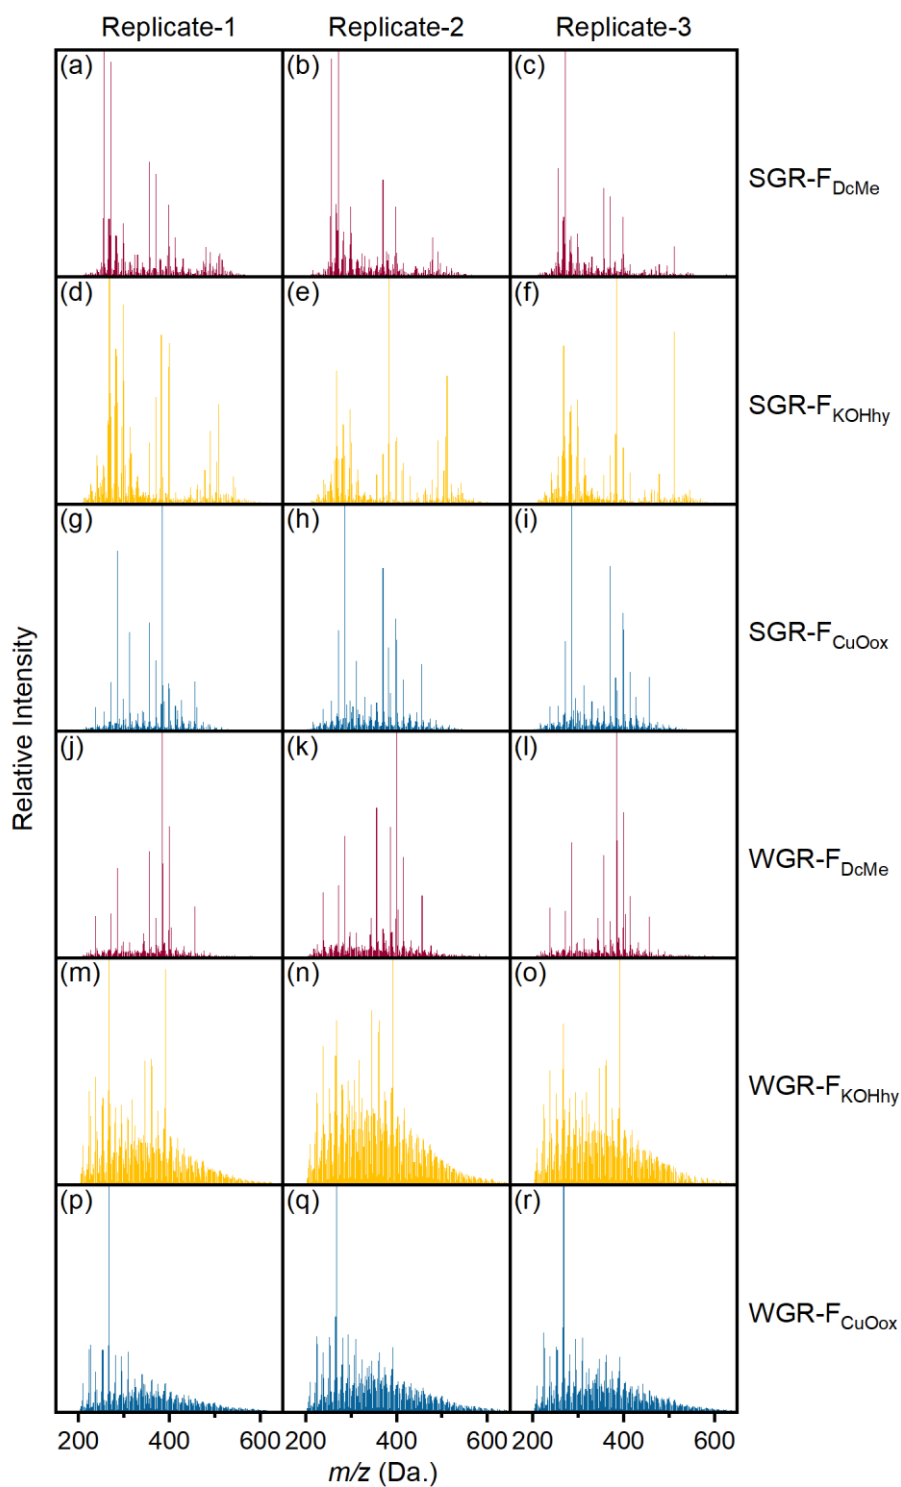

101

102 **Figure S3** Fourier transform ion cyclotron resonance mass spectra (FT-ICR MS) of the different extractable  
 103 fractions of organic matter in three replicates of f soil-grown roots (SGR, a-i) and water-grown roots (WGR, j-r).  
 104  $F_{DcMe}$ : dichloromethane and methanol extractable fractions;  $F_{KOHhy}$ : base-hydrolyzable fractions;  $F_{CuOox}$ : CuO-  
 105 oxidizable fractions.

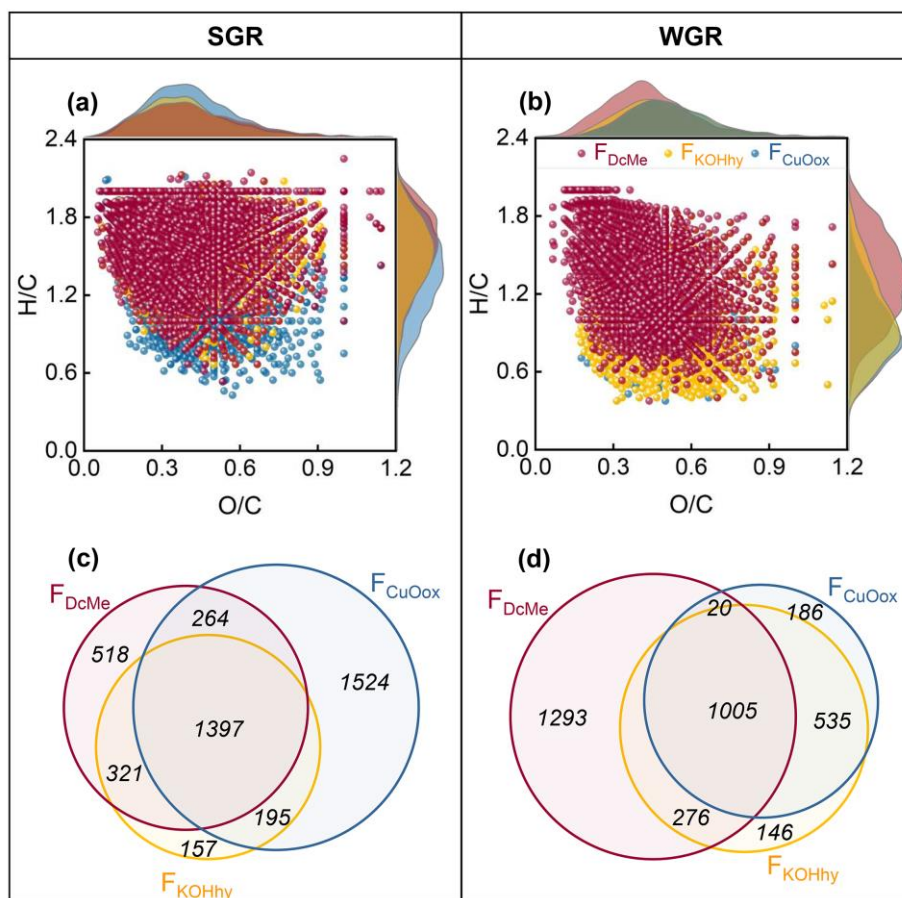

106

107 **Figure S4** van Krevelen and Venn diagrams of Fourier transform ion cyclotron resonance mass spectrometry (FT-  
 108 ICR MS)-detected formulae from sequentially extracted fractions of soil-grown roots (SGR; a, c) and water-grown  
 109 roots (WGR; b, d). F<sub>DcMe</sub>: dichloromethane and methanol extractable fractions; F<sub>KOHhy</sub>: base-hydrolyzable fractions;  
 110 F<sub>CuOox</sub>: CuO-oxidizable fractions. Note that the formulae in van Krevelen diagrams (a, b) are the common formulae  
 111 existing in all three replicates, and the percentage of number and signal of these common formulae in the total  
 112 number and total signal were on average 76% and 90%, respectively (Table S3).
